# Supplementary material
Source: MDPI journal article supplement (https://www.mdpi.com/1424-8247/14/8/810)
Supplement: s1 [file s1]

| <b>Table S4. DKK4 deregulation reported in different tumors and its therapeutic potential.</b> |                          |                                                    |                   |
|------------------------------------------------------------------------------------------------|--------------------------|----------------------------------------------------|-------------------|
| <b>Tumor</b>                                                                                   | <b>Reported function</b> | <b>Selected evidence for therapeutic potential</b> | <b>References</b> |
| <b>Ovarian cancer</b>                                                                          | Oncogene                 | Prognostic factor                                  | 1,2               |
|                                                                                                |                          | <i>In vitro</i> migration/invasion                 | 1                 |
| <b>Pancreatic cancer</b>                                                                       | Oncogene                 | Diagnostic factor                                  | 3–5               |
| <b>Renal cell carcinoma</b>                                                                    | Oncogene                 | Diagnostic factor                                  | 6,7               |
|                                                                                                |                          | Prognostic factor                                  | 7                 |
|                                                                                                |                          | <i>In vitro</i> proliferation                      | 6,7               |
|                                                                                                |                          | <i>In vitro</i> migration/invasion                 | 6,7               |
|                                                                                                |                          | <i>In vivo</i> tumor growth                        | 6,7               |
| <b>Hepatocellular carcinoma</b>                                                                | Tumor suppressor         | Diagnostic factor                                  | 8                 |
|                                                                                                |                          | Prognostic factor                                  | 9                 |
|                                                                                                |                          | <i>In vitro</i> proliferation                      | 8–12              |
|                                                                                                |                          | <i>In vitro</i> migration/invasion                 | 8,9               |
|                                                                                                |                          | <i>In vivo</i> tumor growth                        | 8–12              |
| <b>Colorectal cancer</b>                                                                       | Oncogene                 | Diagnostic factor                                  | 13                |
|                                                                                                |                          | Prognostic factor                                  | 14                |
|                                                                                                |                          | <i>In vitro</i> proliferation                      | 15                |
|                                                                                                |                          | <i>In vitro</i> migration/invasion                 | 15,16             |
|                                                                                                |                          | <i>In vivo</i> tumor growth                        | 17                |
| <b>Gastrointestinal stromal tumor</b>                                                          | Tumor suppressor         | <i>In vitro</i> proliferation                      | 18                |
|                                                                                                | Oncogene                 | Prognostic factor                                  | 19                |
| <b>Lung cancer</b>                                                                             | Oncogene                 | <i>In vitro</i> proliferation                      | 21                |
|                                                                                                |                          | <i>In vitro</i> migration/invasion                 | 21                |
|                                                                                                | Tumor suppressor         | Prognostic factor                                  | 22                |

#### REFERENCES SUPPLEMENTARY TABLE 4

1. Wang, S., Wei, H. & Zhang, S. Dickkopf-4 is frequently overexpressed in epithelial ovarian carcinoma and promotes tumor invasion. *BMC Cancer* **17**, 455 (2017).
2. Wang, Y., Lei, L., Chi, Y. G., Liu, L. B. & Yang, B. P. A comprehensive understanding of ovarian carcinoma survival prognosis by novel biomarkers. *Eur. Rev. Med. Pharmacol. Sci.* (2019) doi:10.26355/eurrev\_201910\_19136.
3. Ouyang, Y., Pan, J., Tai, Q., Ju, J. & Wang, H. Transcriptomic changes associated with DKK4 overexpression in pancreatic cancer cells detected by RNA-Seq. *Tumor Biol.* **37**, 10827–10838 (2016).
4. Park, M. *et al.* Distinct Protein Expression Profiles of Solid-Pseudopapillary Neoplasms of the Pancreas. *J. Proteome Res.* (2015) doi:10.1021/acs.jproteome.5b00423.
5. Zhu, Y. *et al.* Proteomic analysis of solid pseudopapillary tumor of the pancreas reveals dysfunction of the endoplasmic reticulum protein processing pathway. *Mol. Cell. Proteomics* (2014) doi:10.1074/mcp.M114.038786.
6. Hirata, H. *et al.* DICKKOPF-4 activates the noncanonical c-Jun-NH2 kinase signaling pathway while inhibiting the Wnt-canonical pathway in human renal cell carcinoma. *Cancer* **117**, 1649–1660 (2011).
7. Zhai, W. *et al.* High expression of the secreted protein dickkopf homolog 4: Roles in invasion and metastasis of renal cell carcinoma and its association with von Hippel-Lindau gene. *Int. J. Mol. Med.*

**33**, 1319–1326 (2014).

8. Fatima, S. *et al.* Dickkopf 4 (DKK4) acts on Wnt/B-catenin pathway by influencing B-catenin in hepatocellular carcinoma. *Oncogene* **31**, 4233–4244 (2012).
9. Liao, C. H. *et al.* Dickkopf 4 positively regulated by the thyroid hormone receptor suppresses cell invasion in human hepatoma cells. *Hepatology* **55**, 910–920 (2012).
10. Chi, H. C. *et al.* Thyroid hormone receptor inhibits hepatoma cell migration through transcriptional activation of Dickkopf 4. *Biochem. Biophys. Res. Commun.* **439**, 60–65 (2013).
11. Chouhan, S. *et al.* Glucose induced activation of canonical Wnt signaling pathway in hepatocellular carcinoma is regulated by DKK4. *Sci. Rep.* **6**, 27558 (2016).
12. Suresh, S. *et al.* SRC-2-mediated coactivation of anti-tumorigenic target genes suppresses MYC-induced liver cancer. *PLoS Genet.* (2017) doi:10.1371/journal.pgen.1006650.
13. Matsui, A. *et al.* DICKKOPF-4 and -2 genes are upregulated in human colorectal cancer. *Cancer Sci.* **100**, 1923–1930 (2009).
14. Tsukui, Y. *et al.* Dickkopf-4 gene expression is associated with differentiation and lymph node metastasis in colorectal cancer. *JGH Open* (2019) doi:10.1002/jgh3.12177.
15. He, S., Shen, J., Hu, N., Xu, X. & Li, J. DKK4 enhances resistance to chemotherapeutics 5-Fu and YN968D1 in colorectal cancer cells. *Oncol. Lett.* **13**, 587–592 (2017).
16. Pendás-Franco, N. *et al.* DICKKOPF-4 is induced by TCF/ $\beta$ -catenin and upregulated in human colon cancer, promotes tumour cell invasion and angiogenesis and is repressed by 1 $\alpha$ ,25-dihydroxyvitamin D3. *Oncogene* **27**, 4467–4477 (2008).
17. Chen, H. J. *et al.* Comprehensive models of human primary and metastatic colorectal tumors in immunodeficient and immunocompetent mice by chemokine targeting. *Nat. Biotechnol.* (2015) doi:10.1038/nbt.3239.
18. Baehs, S. *et al.* Dickkopf-4 is frequently down-regulated and inhibits growth of colorectal cancer cells. *Cancer Lett.* **276**, 152–159 (2009).
19. Wang, M. *et al.* Aberrant accumulation of Dickkopf 4 promotes tumor progression via forming the immune suppressive microenvironment in gastrointestinal stromal tumor. *Cancer Med.* (2019) doi:10.1002/cam4.2437.
20. Zeng, S. *et al.* Wnt/ $\beta$ -catenin signaling contributes to tumor malignancy and is targetable in gastrointestinal stromal tumor. *Mol. Cancer Ther.* (2017) doi:10.1158/1535-7163.MCT-17-0139.
21. Yang, X., Liu, Y., Li, W., Li, A. & Sun, Q. DKK4-knockdown enhances chemosensitivity of A549/DTX cells to docetaxel. *Acta Biochim. Biophys. Sin. (Shanghai)*. (2017) doi:10.1093/abbs/gmx086.
22. Bahl, C., Singh, N., Behera, D. & Sharma, S. Genetic Variants in the Wingless Antagonist Genes (sFRP, DKK, and Axin2) Predict the Overall Survival and Prognosis of North Indian Lung Cancer Patients Treated with Platinum-Based Doublet Chemotherapy. *Cancer Biother. Radiopharm.* (2018) doi:10.1089/cbr.2018.2491.
