# Supplementary material
Source: MDPI journal article supplement (https://www.mdpi.com/1424-8247/14/8/810)
Supplement: s1 [file s1]

| <b>Table S2. DKK2 deregulation reported in different tumors and its therapeutic potential.</b> |                          |                                                    |                   |
|------------------------------------------------------------------------------------------------|--------------------------|----------------------------------------------------|-------------------|
| <b>Tumor</b>                                                                                   | <b>Reported function</b> | <b>Selected evidence for therapeutic potential</b> | <b>References</b> |
| <b>Esophageal carcinoma</b>                                                                    | Oncogene                 | Prognostic factor                                  | 1                 |
|                                                                                                |                          | Prognostic factor                                  | 2,3               |
| <b>Ewing sarcoma</b>                                                                           | Oncogene                 | <i>In vitro</i> proliferation                      | 3                 |
|                                                                                                |                          | <i>In vitro</i> migration/invasion                 | 3                 |
|                                                                                                |                          | <i>In vivo</i> tumor growth                        | 3                 |
|                                                                                                |                          | <i>In vivo</i> tumor growth                        | 4                 |
| <b>Melanoma</b>                                                                                | Oncogene                 | Prognostic factor                                  | 5                 |
| <b>Prostate cancer</b>                                                                         | Oncogene                 | <i>In vitro</i> proliferation                      | 5                 |
|                                                                                                |                          | <i>In vitro</i> migration/invasion                 | 5                 |
| <b>Breast cancer</b>                                                                           | Tumor suppressor         | Prognostic factor                                  | 6                 |
|                                                                                                |                          | <i>In vitro</i> proliferation                      | 6                 |
|                                                                                                |                          | <i>In vitro</i> migration/invasion                 | 6                 |
|                                                                                                |                          | <i>In vivo</i> tumor growth                        | 6                 |
| <b>Gastric cancer</b>                                                                          | Tumor suppressor         | Diagnostic factor                                  | 7                 |
|                                                                                                |                          | Prognostic factor                                  | 8,9               |
|                                                                                                |                          | <i>In vitro</i> proliferation                      | 9                 |
|                                                                                                |                          | <i>In vitro</i> migration/invasion                 | 9                 |
| <b>Hepatocellular carcinoma</b>                                                                | Tumor suppressor         | Prognostic factor                                  | 10,11             |
|                                                                                                |                          | <i>In vitro</i> proliferation                      | 11                |
|                                                                                                |                          | <i>In vivo</i> tumor growth                        | 10                |
| <b>Neuroblastoma</b>                                                                           | Tumor suppressor         | Prognostic factor                                  | 12                |
| <b>Ovarian cancer</b>                                                                          | Tumor suppressor         | Prognostic factor                                  | 13                |
|                                                                                                |                          | <i>In vitro</i> proliferation                      | 13                |
|                                                                                                |                          | <i>In vitro</i> migration/invasion                 | 13                |
|                                                                                                |                          | <i>In vivo</i> tumor growth                        | 13                |
| <b>Renal cell carcinoma</b>                                                                    | Tumor suppressor         | Prognostic factor                                  | 14,15             |
|                                                                                                |                          | <i>In vitro</i> proliferation                      | 14                |
| <b>Colorectal cancer</b>                                                                       | Oncogene                 | Prognostic factor                                  | 16                |
|                                                                                                |                          | <i>In vivo</i> tumor growth                        | 16                |
|                                                                                                | Tumor suppressor         | Prognostic factor                                  | 7,17              |
|                                                                                                |                          | <i>In vitro</i> proliferation                      | 17                |
|                                                                                                |                          | <i>In vitro</i> migration/invasion                 | 17                |
|                                                                                                |                          | <i>In vivo</i> tumor growth                        | 17                |

#### REFERENCES SUPPLEMENTARY TABLE 2

- Schiffmann, L. M. *et al.* Dickkopf-2 (DKK2) as context dependent factor in patients with esophageal adenocarcinoma. *Cancers (Basel)*. (2020) doi:10.3390/cancers12020451.
- Staeger, M. S. *et al.* DNA microarrays reveal relationship of Ewing family tumors to both endothelial and fetal neural crest-derived cells and define novel targets. *Cancer Res.* (2004) doi:10.1158/0008-5472.CAN-03-4059.
- Hauer, K. *et al.* DKK2 mediates osteolysis, invasiveness, and metastatic spread in ewing sarcoma. *Cancer Res.* **73**, 967–977 (2013).
- Park, H. *et al.* Distinct roles of DKK1 and DKK2 in tumor angiogenesis. *Angiogenesis* **17**, 221–234 (2014).

5. Xu, W. *et al.* Dickkopf 2 promotes proliferation and invasion via Wnt signaling in prostate cancer. *Mol. Med. Rep.* **14**, 2283–2288 (2016).
6. Mu, J. *et al.* Dickkopf-related protein 2 induces G0/G1 arrest and apoptosis through suppressing Wnt/ $\beta$ -catenin signaling and is frequently methylated in breast cancer. *Oncotarget* **8**, 39443–39459 (2017).
7. Sato, H. *et al.* Frequent epigenetic inactivation of DICKKOPF family genes in human gastrointestinal tumors. *Carcinogenesis* **28**, 2459–66 (2007).
8. Wang, H. *et al.* Concurrent hypermethylation of SFRP2 and DKK2 activates the Wnt/ $\beta$ -catenin pathway and is associated with poor prognosis in patients with gastric cancer. *Mol. Cells* **40**, 45–53 (2017).
9. Wang, L., Wang, H., Duan, X., Dai, P. & Li, J. Comprehensive Analysis of the Canonical and Non-canonical Wnt Signaling Pathways in Gastric Cancer. *Dig. Dis. Sci.* (2019) doi:10.1007/s10620-019-05606-6.
10. Maass, T. *et al.* Increased liver carcinogenesis and enrichment of stem cell properties in livers of Dickkopf 2 (*Dkk2*) deleted mice. *Oncotarget* **7**, 28903–28913 (2016).
11. Lin, Y. F. *et al.* Selective Retention of an Inactive Allele of the DKK2 Tumor Suppressor Gene in Hepatocellular Carcinoma. *PLoS Genet.* **12**, e1006051 (2016).
12. Revet, I. *et al.* MSX1 induces the Wnt pathway antagonist genes DKK1, DKK2, DKK3, and SFRP1 in neuroblastoma cells, but does not block Wnt3 and Wnt5A signalling to DVL3. *Cancer Lett.* (2010) doi:10.1016/j.canlet.2009.08.019.
13. Zhu, J., Zhang, S., Gu, L. & Di, W. Epigenetic silencing of DKK2 and Wnt signal pathway components in human ovarian carcinoma. *Carcinogenesis* **33**, 2334–2343 (2012).
14. Hirata, H. *et al.* Wnt antagonist gene DKK2 is epigenetically silenced and inhibits renal cancer progression through apoptotic and cell cycle pathways. *Clin. Cancer Res.* **15**, 5679–5687 (2009).
15. Hirata, H. *et al.* Wnt antagonist gene polymorphisms and renal cancer. *Cancer* (2009) doi:10.1002/cncr.24491.
16. Xiao, Q. *et al.* DKK2 imparts tumor immunity evasion through  $\beta$ -catenin-independent suppression of cytotoxic immune-cell activation. *Nat. Med.* (2018) doi:10.1038/nm.4496.
17. Wang, C. *et al.* Dickkopf-related protein 2 is epigenetically inactivated and suppresses colorectal cancer growth and tumor metastasis by antagonizing Wnt/ $\beta$ -catenin signaling. *Cell. Physiol. Biochem.* **41**, 1709–1724 (2017).
